# Supplementary material for: An indigenous community-based monitoring system for assessing forest health in New Zealand
Source: Springer Nature journal article supplement (doi:10.1007/s10531-016-1142-6), 2016-05-30
Supplement: MOESM1 [file 10210906]

**Online Resource 1**

**Biodiversity and Conservation**

**An indigenous community-based monitoring system for assessing forest health in New Zealand**

Lyver, P.O’B.,1* Timoti, P.,2 Jones, C.J.,1 Richardson, S.J.,1 Tahi, B.L.2 and Greenhalgh, S.3

Author for correspondence: [lyverp@landcareresearch.co.nz](mailto:lyverp@landcareresearch.co.nz)

***Transcript 1***

“Ko te ao katoa o te haere ki te mahi kai... Te haere ki te puihi ki te whai poaka, ki te rama tuna, ki te whakarapu tuna, ēra atu momo āhuatanga katoa, i kai-ngakau katoa au ki ēra mahi, karekau he mea i rewa ake i tētahi. He ōrite katoa taku kai-ngakau ki ēra mahi, na te mea wētahi o ngā mahi he wahanga ano o te tau ka mahia a i wētahi ano... No reira karekau i tino pātukituki kia rātou ēra tū-momo haere ki te puihi, ki te whai poaka, te mahi tuna ... A koira ra tāku titiro” (Te Mahururangi Te Kaawa 2014).

***Transcript 2***

“Rerekē katoa to tāua ngahere ināianei. Te take i tēra wā, he āhua rahi tonu ngā kararehe kāre ano i uru mai ki to tāua ngahere, heoi ano iti nei te tia, te poaka, koira noaiho ngā kararehe i roto i to tāua ngahere. E kōrero ana au nei, atu i ngā tau 45. He rahi te poaka, engari karekau ngā poaka o wēra wā e kaha ana te tukituki i roto i te ngahere. Ka oho ake he pātai i roto i tēra kōrero? He aha i kore ai e kaha te tukituki o ngā poaka i roto o te ngahere i ēra wa? Te take he nui te hua o te rakau, koira katoa kai reira katoa ngā kai ma ngā poaka, kāre e tuki i te whenua ki te kimi i tahi oranga. Kai te haramai katoa ngā oranga mai i ngā rakau. Na te heringa mai o ētahi atu kararehe ki roto i to tāua ngahere hei kai i aua hua ra ana kua kore he kai ma te poaka i roto i te ngahere ana heoi ano te aro, ko raro o te whenua, ana e whakamārama noaiho i ēra, te rerekē o tēra wā ne, ka hoki mai ano ki te tia, pēra ano te āhuatanga ki te tia. Te taenga tuatahi mai o te tia ki roto i o tāua ngahere nei, rahi ke ngā rakau pakupaku katoa, wēra momo āhuatanga ana ngā wāhi hoki e kī atu nei au kia koe, topea ana te puihi hai whakatipu karaehe, nui kē ngā kai i roto i te ngahere i tēra wā, tae mai ki nāianei, ki te iti o ngā kai o roto i te ngahere, kua aha te nuinga o ngā rakau pakupaku e kī atu ra au kia koe, kua kore katoa ēra. Kua huri te tia ki te kai i ngā kiri o waua rakau pakupaku rā engari kua nunui kē hoki, kua kore hoki e tāea te piki ki runga ana, kua kainga ko ngā kiri ana kua hemo ngā rakau. Koira te rerekē o ngā āhuatanga o tēra wā ana ka hoki haere mai kia tāua” (Tahae Doherty 2014).

***Transcript 3***

“... kua kore e rite ki ngā wā o mua ra, haruru ana te manu. Ekene pea, kua kore ahau te tangata nei e mōhio ki te whakarongo, me ngā rakau? Ko ngā rakau tēnei, ēngari kai te kite ake au, i ngā manu kai te… kua kore kē e pēra i mua ra. Haruru tonu te tangi a te manu. Ahakoa ngā rakau. Ka mea ana hoki, ka noho mātou, pēna he aha te haere i roto i te ngahere a ka noho mātou, ka noho te Koroua, ko ia te mea ka tere makere i runga i tana hoiho ki te whakatā engari, ka noho ia ki reira kōrero ai. “A, kai te pēnei te haere o te mea. He aha tēna?” Ana he kōrero, kāre nei e arohia e hau i wēra tāima. Ka mea ana, “Tēna ia nei whakarongo.” Kai roto i te ngahere tēnei, a, ko ngā manu wēra. Ka pēnei, “Kua kore kē, kāre koutou i te whakarongo ki ngā kōrero a ngā rakau, a ngā manu kia rātou ano.” Kua mea au, “A, me pēhea ahau e mōhio e pēhea ana ngā rakau?” (Menu Ripia 2014).

***Transcript 4***

“He mātotoru te tipu a te mauku i ngā wāhi katoa ēngari ka taka, me kī, ki ngā tau, ki wōku titiro i wēra wā, he haere hoki au ki te kato pikopiko a ka kite ahau i te kore haere o te mauku. Ka āhua tata pea te rua tekau tau inaianei. I pēra ai taku kōrero na te mea, he āhua rahi tonu ngā wāhi haere ai au ki te kato pikopiko, hoki atu, hoki atu ia tau. I āu e noho ana i Te Waiiti, koira. Engari, no ngā tau o muri mai ka kite au kua kore noaiho he mauku. Tētahi wāhi me ki i Te Waiongaonga ae, he mātotoru te mauku i reira i mua, ana koira hoki tētahi o ngā tu wāhi haere ai au ki te kato mauku, a, pikopiko. I tumeke katoa nei au i taku kitehanga, a kua kore kē te mauku. Pēnei, i maumahara tonu au i taku kite tuatahihanga i tēra āhua, kātahi au ka whakaaro, “I konei te mauku, i konei tonu! I te wāhi e tū nei ana kua kore” (Menu Ripia 2014).

***Transcript 5***

“Te wā ia mātou rā e tama, matomato ana kē te tipu o te ngahere. A, i tētahi wāhi i haere ai au, kua kore noaiho au e tino kite i te tawa. Koira hoki wā mātou tino kai, he tawa, nga hua tawa. Ana ia Hanuere, me Pepuere me te whakapaunga o Tīhema, koira te wā mo te tawa, ana kua kore au e kite e horo ana, ko te kupu he horo. Kua horo te tawa, engari te wā ia mātou rā e tama te hua kē ana i Parikaeaea ana i te wharekura rā” (Peho Tamiana 2014).

***Transcript 6***

“Ara tētahi i aroha au ko Ruatahuna tonu, ētā, ki au na na, kua whakatipuhia ki te paina wēra mea, ki ētahi o ngā rakau kei kona, ana ka kite koe i ngā rakau purukamu rā, he kino hoki mo te note wai aye! Ko ngā wāhi e kaha ana te rere o te wai kua kite i te āhua kua maroke haere, kua riro katoa i ngā rakau, kātahi ka mēhia mai kia whiwhi mahi tonu ai ngā mea o te kāinga, ētā ko ngā mea kē o te taone rā, āna e hoa” (Ripia Ripia 2014).

***Transcript 7***

“E hoa, ko te tohu pea o te ora o te ngahere ko ngā ngārara ko ngā manu me ngā kararehe noho o roto o te ngahere, nōreira ngā kararehe ngā ngārara ngā ika ngā manu tūturu kua ngarongaro kē te nuinga nōreira koira kē pea te tohu o te ora o te ngahere. Kei te ora te ngahere mēna kei te ora wēna mea kei te rahi rā te kararehe ēngari i tēnei rā nei kua huri mai ko ngā āhuatanga i kawea mai i whenua mai ki konei rakau mai, kararehe mai manu mai, nōreira ko te ao o te ngahere a Taane, kāre rawa i pēra i te wā o tātou koroua. Na runga tonu i te āhua o ngā tikanga i kawea mai ki konei whakawāteahia te whenua hei nōhanga hei mahi ahu whenua hei whakatipu rākau Pākeha, ah well me pēhea e ora ai ngā rakau Māori.” (Te Rongonui Tahi 2014)

***Transcript 8***

“Koira ētahi tohutohu a ngā koroua kātahi ka whiu i o kupu, kia maumahara ki a koe, ēngari hoki ko tētahi whakatupato mai kāre hoki mātou e mōhio ana ka mea ana, “Eee! he tangata ano kei roto i te puihi, you know tēra kōrero, a, kua mea mātou, “kowai hoki kei roto i te puihi?” wēra kōrero, ko mātou noaiho ra kei roto i te puihi (kua kata). Kia pakeke rāno nei kātahi ka kōrero, “ehe! he tūrehu kei roto i te puihi, he aha hoki te tūrehu? (kua kata ano) wēra kōrero, ara kua mea mai, e kia tupato, e kāre ko koe anahe kei roto i te puihi” (Hariata Haumate 2014).

***Transcript 9***

“Me kī rā, i pakeke mai tātou i runga i ngā kōrero a ō tātou mātua, “ko au koe, me kī ko te ngahere tēra, ko ngahere hoki ahau. A, natemea, I pakeke mai au ki Ruatoki, ā, ka whakahokia mai tokuna pito ki Ruatoki koira taku hono ki taku whenua. Ko taku pito, ki te kore waku whenua, he tangata keretao noaiho ahau, kare he turangawaewae nē. Koira taku hono ki taku whenua, koira taku turangawaewae.” (Tangiora Tawhara 2014).

***Transcript 10***

“Te heri atu ano ai i ngā tikanga e kōrero ake nei au te matemateaone, te whakawhanaungatanga i a tātou, ēra āhuatanga katoa, kia kaha te whakapaihere i a tāua ki ēra āhuatanga ano. Te matemateaone rāua ko te whakawhanaungatanga natemea i kite ahau i tēra kua kore te wairua matemateaone o Ruatahuna, kua āhua pēnei kē i te mea nei he tangata kē koe he tangata kē ahau. Kua āhua pēra kē i taku hokinga mai, kei te āhua pēra tonu, kei te āhua tawhiti tonu tātou. Ehara i te tawhiti weriweri, he tawhiti e tāea e tāua te paihere anō, hēoi anō, ko te mea kē me pēhea ta tāua. Kowai rānei hei ārahi ki te whakahoki mai i a tāua ki taua āhuatanga anō?” (Hariata Haumate 2014).
